# Supplementary material for: Exploring the Dynamic Core Microbiome of Plaque Microbiota during Head-and-Neck Radiotherapy Using Pyrosequencing
Source: PubMed Central journal article supplement (PMC3578878; doi:10.1371/journal.pone.0056343), 2013-02-21

PT Rarefaction Curve

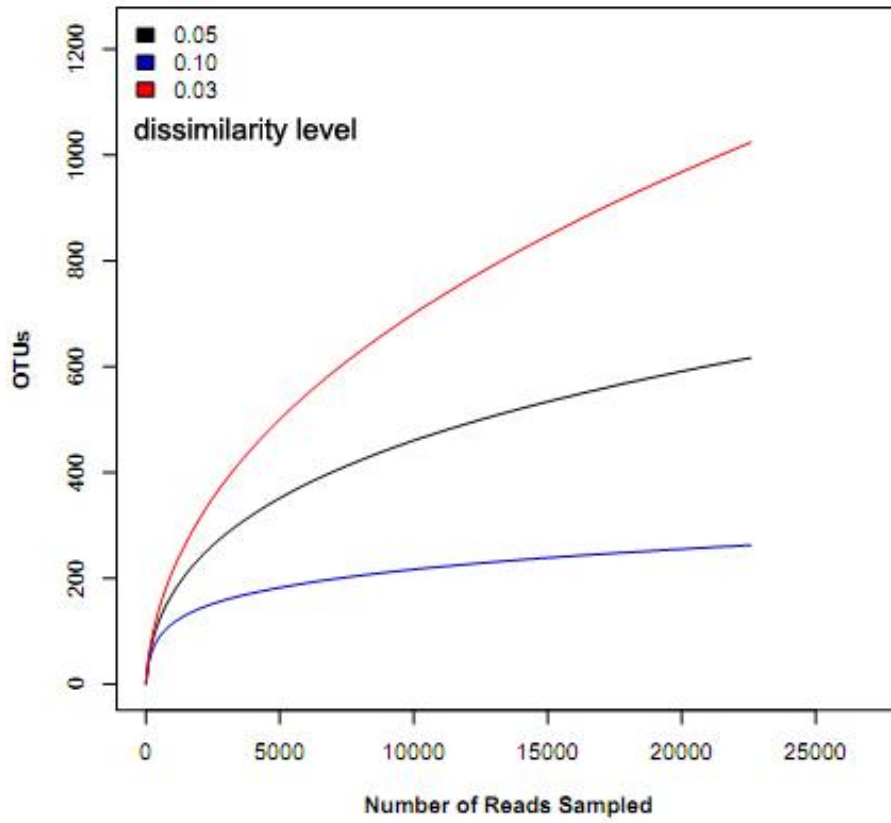

10Gy Rarefaction Curve

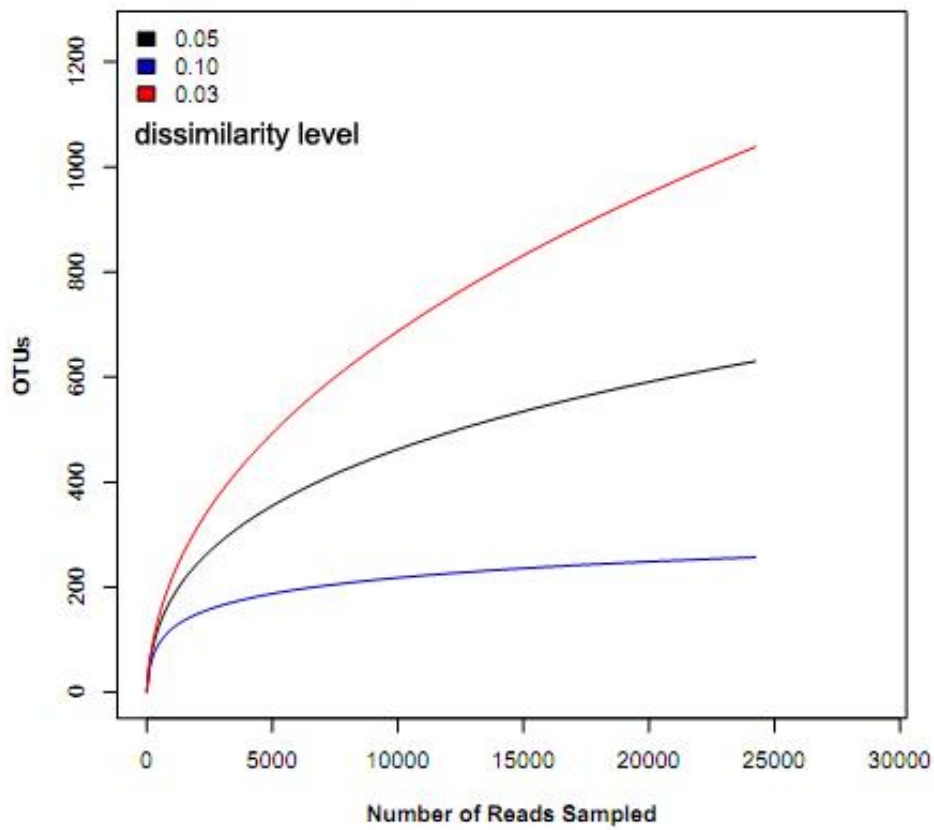

20Gy Rarefaction Curve

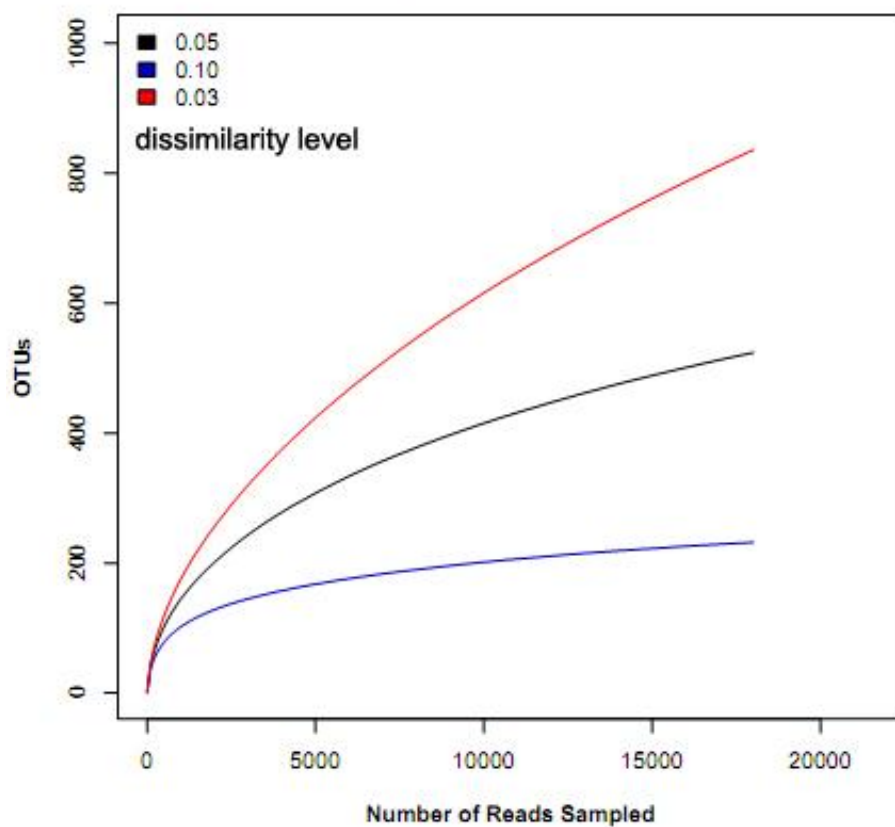

30Gy Rarefaction Curve

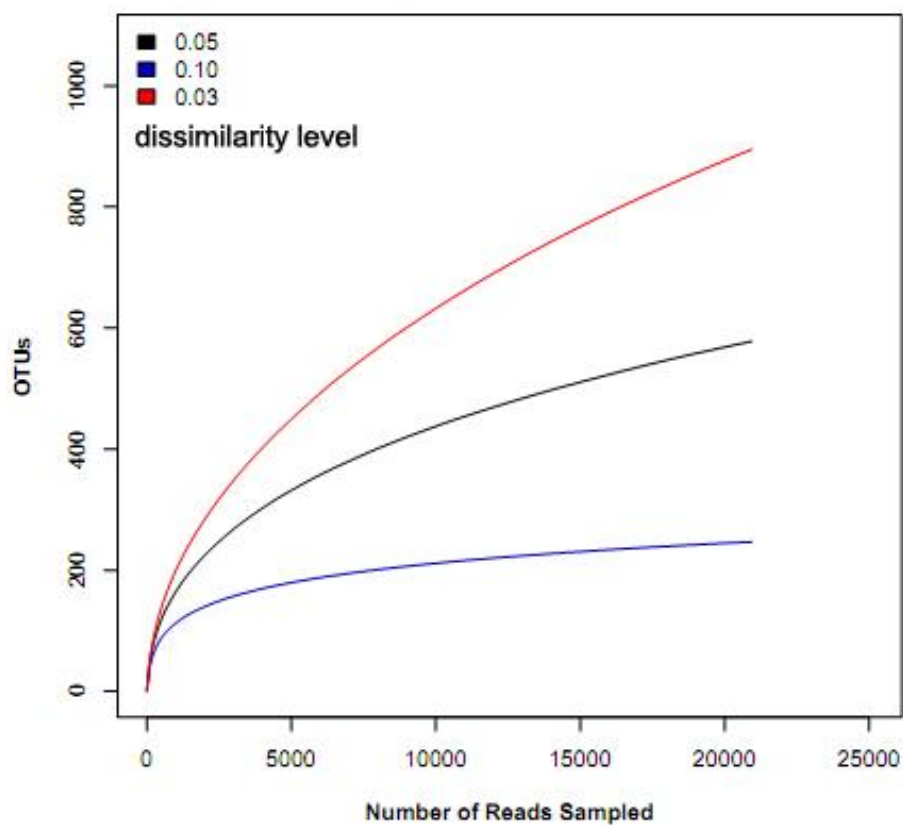

40Gy Rarefaction Curve

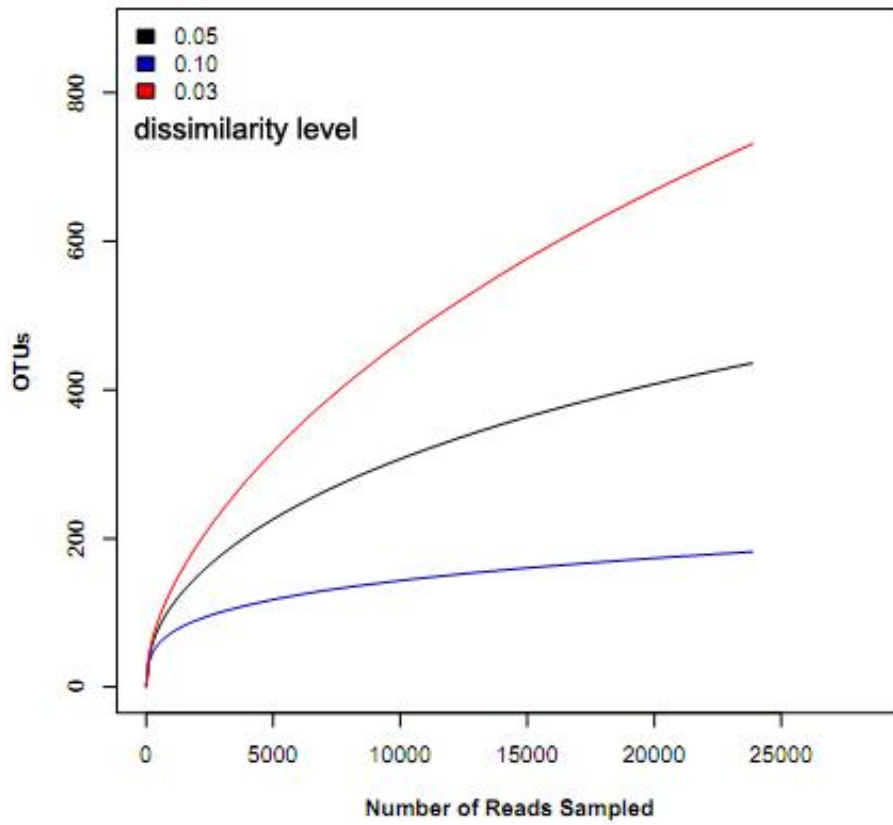

50Gy Rarefaction Curve

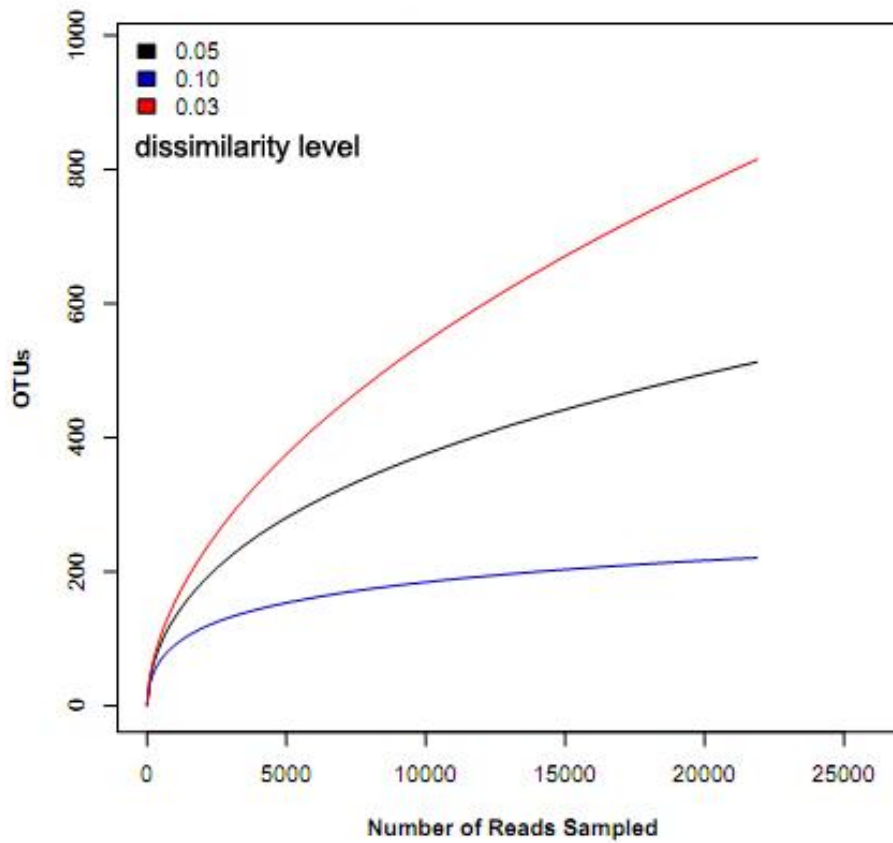

60Gy Rarefaction Curve

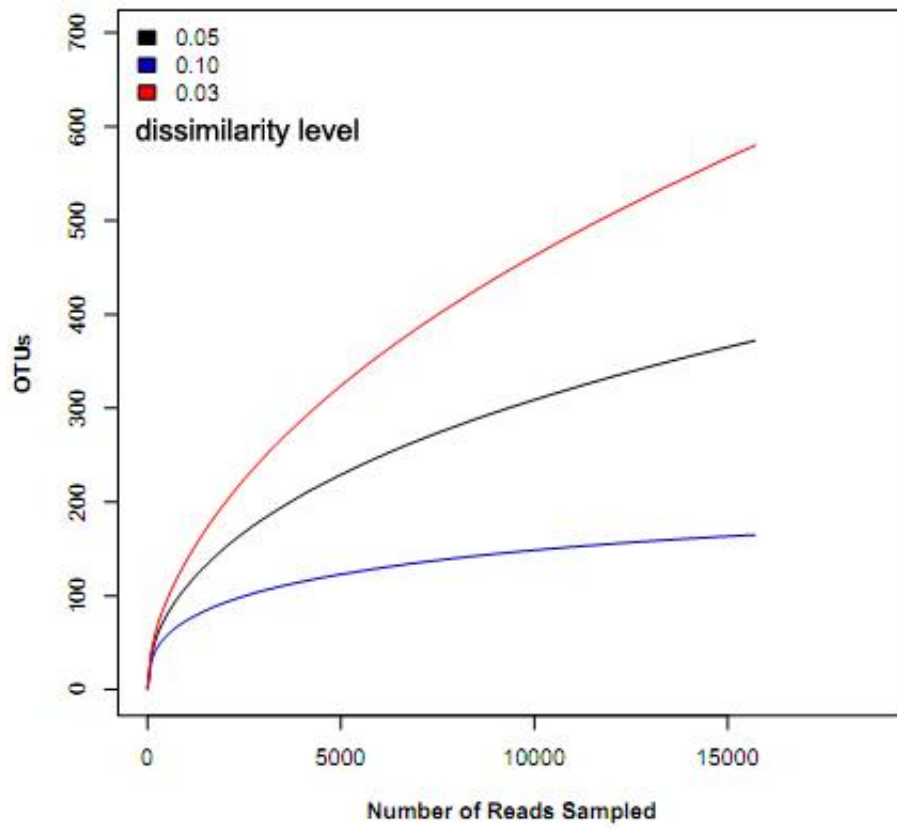

Supplement: pone.0056343.s001.pdf [file pone.0056343.s001.pdf]
